# Supplementary material for: Theoretical investigation of defective MXenes as potential electrocatalysts for CO reduction toward C2 products
Source: Royal Society of Chemistry journal article supplement (doi:10.1039/d1cp01291f), 2021-01-01
Supplement: d1cp01291f1.pdf [file d1cp01291f1.pdf]

## Supporting Information

# Theoretical investigation of defective MXenes as potential electrocatalysts for CO reduction toward C<sub>2</sub> products

Xu Qian,<sup>1,2,3</sup> Lei Li,<sup>1,2</sup> Yanle Li,<sup>1,2</sup> Zeyu Liu,<sup>4</sup> Ziqi Tian,<sup>\*1,2</sup> Cheng Zhan,<sup>\*5</sup> Liang Chen<sup>\*1,2</sup>

<sup>1</sup>Ningbo Institute of Materials Technology and Engineering, Chinese Academy of Sciences, Ningbo 315201, Zhejiang, China.

<sup>2</sup>University of Chinese Academy of Sciences, 100049, Beijing, China.

<sup>3</sup>Nano Science and Technology Institute, University of Science and Technology of China, Suzhou, 215123, China

<sup>4</sup>School of Environmental and Chemical Engineering, Jiangsu University of Science and Technology, Zhenjiang 212018, People's Republic of China

<sup>5</sup>Department of Chemistry, University of California, Riverside, California 92521, United States

Email: [tianziqi@nimte.ac.cn](mailto:tianziqi@nimte.ac.cn); [czhan021@ucr.edu](mailto:czhan021@ucr.edu); [chenliang@nimte.ac.cn](mailto:chenliang@nimte.ac.cn)

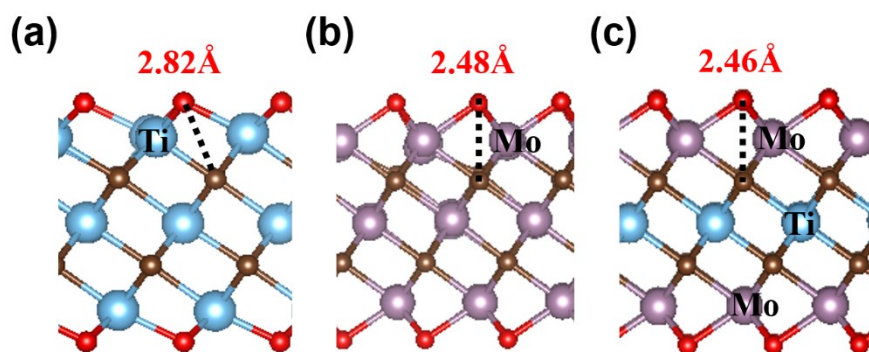

**Figure S1.** The most stable configurations of the terminal oxygen in (a) $\text{Ti}_3\text{C}_2$ (b) $\text{Mo}_3\text{C}_2$ (c) $\text{Mo}_2\text{TiC}_2$ .

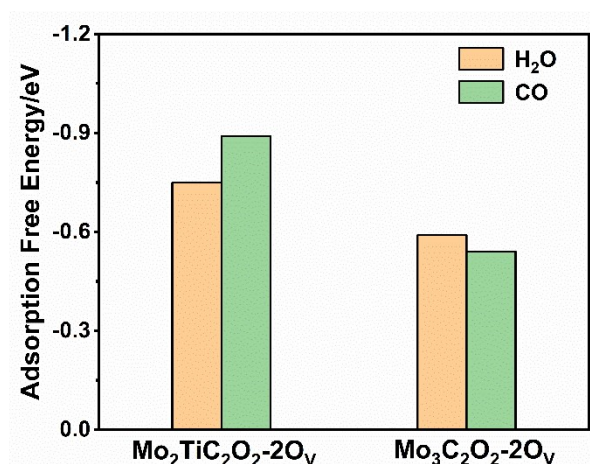

**Figure S2.** Comparison adsorption free energies of  $\text{H}_2\text{O}$  and  $\text{CO}$  on selected candidates.

**Table S1** Calculated ZPE and TS energies for different species, where the label \* denotes the status of adsorption.

| Adsorbed species  | $\text{Mo}_3\text{C}_2\text{O}_2-2\text{O}_v$ |                      | $\text{Mo}_2\text{TiC}_2\text{O}_2-2\text{O}_v$ |                      |
|-------------------|-----------------------------------------------|----------------------|-------------------------------------------------|----------------------|
|                   | $E_{\text{ZPE}}$ (eV)                         | $E_{\text{TS}}$ (eV) | $E_{\text{ZPE}}$ (eV)                           | $E_{\text{TS}}$ (eV) |
| *CO               | 0.22                                          | 0.09                 | 0.21                                            | 0.07                 |
| *COH              | 0.52                                          | 0.08                 | 0.49                                            | 0.10                 |
| *CHO              | 0.51                                          | 0.08                 | 0.49                                            | 0.10                 |
| *H <sub>2</sub> O | 0.68                                          | 0.09                 | 0.65                                            | 0.11                 |
| *OCCO             | 0.44                                          | 0.15                 | 0.44                                            | 0.14                 |
| *OCCOH            | 0.76                                          | 0.17                 | 0.77                                            | 0.19                 |
| *CO-*CO           | 0.43                                          | 0.24                 | 0.41                                            | 0.19                 |
| *CO-*COH          | 0.70                                          | 0.18                 | 0.71                                            | 0.22                 |

|                                        |      |      |      |      |
|----------------------------------------|------|------|------|------|
| <b>2*COH</b>                           | 0.99 | 0.23 | 1.02 | 0.19 |
| <b>*COH-*COH</b>                       | 1.05 | 0.23 | 1.09 | 0.19 |
| <b>*CCOH</b>                           | 0.66 | 0.13 | 0.67 | 0.11 |
| <b>*CHCOH</b>                          | 0.98 | 0.11 | 0.98 | 0.11 |
| <b>*CCH</b>                            | 0.50 | 0.09 | 0.50 | 0.09 |
| <b>*CHCH</b>                           | 0.83 | 0.07 | 0.82 | 0.08 |
| <b>*CH<sub>2</sub>CH</b>               | 1.08 | 0.09 | 1.08 | 0.11 |
| <b>*CH<sub>2</sub>CH<sub>2</sub></b>   | 1.40 | 0.13 | 1.40 | 0.16 |
| <b>*CH<sub>3</sub>CH<sub>2</sub></b>   | 1.68 | 0.15 | 1.70 | 0.17 |
| <b>*CH<sub>3</sub>CH<sub>3</sub></b>   | 1.99 | 0.20 | 2.01 | 0.23 |
| <b>*CHCHOH</b>                         | 1.26 | 0.13 | 1.26 | 0.16 |
| <b>*CH<sub>2</sub>COH</b>              | 1.24 | 0.13 | 1.22 | 0.12 |
| <b>*CH<sub>2</sub>CHOH</b>             | 1.56 | 0.17 | 1.57 | 0.20 |
| <b>*CH<sub>2</sub>CH<sub>2</sub>OH</b> | 1.86 | 0.21 | 1.86 | 0.17 |
| <b>*CH<sub>3</sub>CH<sub>2</sub>OH</b> | 2.11 | 0.23 | 2.17 | 0.27 |

**The atomic coordinates of all the optimized key intermediates on the Mo<sub>3</sub>C<sub>2</sub>O<sub>2</sub>-2O<sub>V</sub> and Mo<sub>2</sub>TiC<sub>2</sub>O<sub>2</sub>-2O<sub>V</sub> at the DFT-D3 computational level.**

|                                                                     | <b>a</b>       | <b>b</b>       |
|---------------------------------------------------------------------|----------------|----------------|
| <b>Slab/Mo<sub>3</sub>C<sub>2</sub>O<sub>2</sub>-2O<sub>V</sub></b> | <b>9.13230</b> | <b>9.13230</b> |

|             |            |                 |                  |                 |
|-------------|------------|-----------------|------------------|-----------------|
| <b>Mo1</b>  | <b>1.0</b> | <b>0.111183</b> | <b>0.222375</b>  | <b>0.369955</b> |
| <b>Mo2</b>  | <b>1.0</b> | <b>0.222442</b> | <b>0.111089</b>  | <b>0.629836</b> |
| <b>Mo3</b>  | <b>1.0</b> | <b>0.000566</b> | <b>-0.000676</b> | <b>0.498403</b> |
| <b>Mo4</b>  | <b>1.0</b> | <b>0.444664</b> | <b>0.221893</b>  | <b>0.370963</b> |
| <b>Mo5</b>  | <b>1.0</b> | <b>0.554719</b> | <b>0.111240</b>  | <b>0.629807</b> |
| <b>Mo6</b>  | <b>1.0</b> | <b>0.334140</b> | <b>0.002164</b>  | <b>0.497991</b> |
| <b>Mo7</b>  | <b>1.0</b> | <b>0.778608</b> | <b>0.222283</b>  | <b>0.369977</b> |
| <b>Mo8</b>  | <b>1.0</b> | <b>0.889612</b> | <b>0.113154</b>  | <b>0.629322</b> |
| <b>Mo9</b>  | <b>1.0</b> | <b>0.664994</b> | <b>-0.000750</b> | <b>0.498415</b> |
| <b>Mo10</b> | <b>1.0</b> | <b>0.110578</b> | <b>0.553429</b>  | <b>0.372488</b> |
| <b>Mo11</b> | <b>1.0</b> | <b>0.207457</b> | <b>0.433630</b>  | <b>0.623502</b> |
| <b>Mo12</b> | <b>1.0</b> | <b>0.001632</b> | <b>0.336584</b>  | <b>0.501391</b> |
| <b>Mo13</b> | <b>1.0</b> | <b>0.444935</b> | <b>0.553842</b>  | <b>0.372136</b> |
| <b>Mo14</b> | <b>1.0</b> | <b>0.544080</b> | <b>0.422061</b>  | <b>0.618018</b> |
| <b>Mo15</b> | <b>1.0</b> | <b>0.336908</b> | <b>0.338797</b>  | <b>0.502984</b> |
| <b>Mo16</b> | <b>1.0</b> | <b>0.776600</b> | <b>0.553881</b>  | <b>0.372131</b> |
| <b>Mo17</b> | <b>1.0</b> | <b>0.892289</b> | <b>0.433641</b>  | <b>0.623556</b> |
| <b>Mo18</b> | <b>1.0</b> | <b>0.668080</b> | <b>0.338635</b>  | <b>0.502992</b> |

|      |     |           |          |          |
|------|-----|-----------|----------|----------|
| Mo19 | 1.0 | 0.109550  | 0.887572 | 0.372089 |
| Mo20 | 1.0 | 0.224247  | 0.782418 | 0.628980 |
| Mo21 | 1.0 | -0.000748 | 0.669582 | 0.501949 |
| Mo22 | 1.0 | 0.445002  | 0.887494 | 0.372106 |
| Mo23 | 1.0 | 0.563789  | 0.799368 | 0.624769 |
| Mo24 | 1.0 | 0.336671  | 0.669697 | 0.501975 |
| Mo25 | 1.0 | 0.777275  | 0.887432 | 0.371068 |
| Mo26 | 1.0 | 0.901391  | 0.799218 | 0.624667 |
| Mo27 | 1.0 | 0.665222  | 0.664424 | 0.507518 |
| C1   | 1.0 | 0.108522  | 0.216364 | 0.564290 |
| C2   | 1.0 | 0.223312  | 0.116438 | 0.434698 |
| C3   | 1.0 | 0.437099  | 0.208276 | 0.563952 |
| C4   | 1.0 | 0.559740  | 0.116381 | 0.434700 |
| C5   | 1.0 | 0.774220  | 0.216433 | 0.564238 |
| C6   | 1.0 | 0.890383  | 0.114013 | 0.434513 |
| C7   | 1.0 | 0.114747  | 0.563540 | 0.563163 |
| C8   | 1.0 | 0.223185  | 0.443034 | 0.436095 |
| C9   | 1.0 | 0.444142  | 0.561815 | 0.573933 |
| C10  | 1.0 | 0.555999  | 0.445097 | 0.436561 |
| C11  | 1.0 | 0.783615  | 0.561557 | 0.573853 |
| C12  | 1.0 | 0.886792  | 0.442940 | 0.436156 |
| C13  | 1.0 | 0.118265  | 0.894046 | 0.565202 |
| C14  | 1.0 | 0.220526  | 0.774367 | 0.435488 |
| C15  | 1.0 | 0.441859  | 0.894148 | 0.565219 |
| C16  | 1.0 | 0.558056  | 0.775756 | 0.435714 |
| C17  | 1.0 | 0.781183  | 0.896461 | 0.563786 |
| C18  | 1.0 | 0.884381  | 0.775708 | 0.435709 |
| O1   | 1.0 | 0.113599  | 0.226610 | 0.688507 |
| O2   | 1.0 | 0.221202  | 0.107915 | 0.312011 |
| O3   | 1.0 | 0.446195  | 0.226422 | 0.688710 |
| O4   | 1.0 | 0.553903  | 0.107304 | 0.311986 |
| O5   | 1.0 | 0.778943  | 0.226535 | 0.688513 |
| O6   | 1.0 | 0.888635  | 0.110079 | 0.311194 |
| O7   | 1.0 | 0.107468  | 0.548413 | 0.685870 |
| O8   | 1.0 | 0.224415  | 0.446182 | 0.312319 |
| O9   | 1.0 | 0.555873  | 0.443293 | 0.312494 |
| O10  | 1.0 | 0.890873  | 0.446037 | 0.312367 |
| O11  | 1.0 | 0.112078  | 0.891703 | 0.689250 |
| O12  | 1.0 | 0.221318  | 0.775626 | 0.313244 |
| O13  | 1.0 | 0.445922  | 0.892168 | 0.689198 |
| O14  | 1.0 | 0.554375  | 0.774079 | 0.312524 |
| O15  | 1.0 | 0.779973  | 0.893991 | 0.687386 |
| O16  | 1.0 | 0.887053  | 0.774178 | 0.312509 |

|                                                                    | a       | b       |
|--------------------------------------------------------------------|---------|---------|
| *CO/Mo <sub>3</sub> C <sub>2</sub> O <sub>2</sub> -2O <sub>v</sub> | 9.13230 | 9.13230 |

|      |     |          |          |          |
|------|-----|----------|----------|----------|
| Mo1  | 1.0 | 0.115019 | 0.227108 | 0.369881 |
| Mo2  | 1.0 | 0.223357 | 0.115291 | 0.627714 |
| Mo3  | 1.0 | 0.002575 | 0.001511 | 0.497706 |
| Mo4  | 1.0 | 0.448439 | 0.227257 | 0.370237 |
| Mo5  | 1.0 | 0.555854 | 0.115079 | 0.627795 |
| Mo6  | 1.0 | 0.335251 | 0.003094 | 0.497292 |
| Mo7  | 1.0 | 0.782057 | 0.227194 | 0.369745 |
| Mo8  | 1.0 | 0.890151 | 0.116594 | 0.627375 |
| Mo9  | 1.0 | 0.665286 | 0.000834 | 0.497645 |
| Mo10 | 1.0 | 0.114017 | 0.558667 | 0.370282 |
| Mo11 | 1.0 | 0.210510 | 0.440067 | 0.623967 |
| Mo12 | 1.0 | 0.003721 | 0.340966 | 0.501073 |
| Mo13 | 1.0 | 0.447898 | 0.559553 | 0.371293 |
| Mo14 | 1.0 | 0.557606 | 0.448000 | 0.628177 |
| Mo15 | 1.0 | 0.334976 | 0.337336 | 0.501420 |
| Mo16 | 1.0 | 0.780887 | 0.559896 | 0.371451 |
| Mo17 | 1.0 | 0.893915 | 0.439261 | 0.623627 |
| Mo18 | 1.0 | 0.667993 | 0.336030 | 0.500877 |
| Mo19 | 1.0 | 0.114739 | 0.893145 | 0.370935 |
| Mo20 | 1.0 | 0.224278 | 0.783464 | 0.627855 |
| Mo21 | 1.0 | 0.002042 | 0.670864 | 0.500080 |
| Mo22 | 1.0 | 0.448413 | 0.892770 | 0.370739 |
| Mo23 | 1.0 | 0.564891 | 0.797878 | 0.624265 |
| Mo24 | 1.0 | 0.336148 | 0.670719 | 0.500064 |
| Mo25 | 1.0 | 0.781280 | 0.892765 | 0.370820 |
| Mo26 | 1.0 | 0.897462 | 0.798114 | 0.623789 |
| Mo27 | 1.0 | 0.665961 | 0.665451 | 0.504435 |
| C1   | 1.0 | 0.110918 | 0.221340 | 0.563578 |
| C2   | 1.0 | 0.225594 | 0.119394 | 0.433640 |
| C3   | 1.0 | 0.441752 | 0.218149 | 0.562573 |
| C4   | 1.0 | 0.562252 | 0.119185 | 0.433365 |
| C5   | 1.0 | 0.775456 | 0.220532 | 0.563340 |
| C6   | 1.0 | 0.893194 | 0.118206 | 0.434178 |
| C7   | 1.0 | 0.116504 | 0.566360 | 0.562983 |
| C8   | 1.0 | 0.224297 | 0.448301 | 0.434612 |
| C9   | 1.0 | 0.445200 | 0.561852 | 0.571290 |
| C10  | 1.0 | 0.557984 | 0.448507 | 0.435854 |
| C11  | 1.0 | 0.782711 | 0.561518 | 0.570724 |
| C12  | 1.0 | 0.891743 | 0.448202 | 0.434611 |
| C13  | 1.0 | 0.119009 | 0.895721 | 0.563639 |
| C14  | 1.0 | 0.223410 | 0.778261 | 0.433842 |

|     |     |          |          |          |
|-----|-----|----------|----------|----------|
| C15 | 1.0 | 0.442686 | 0.895496 | 0.563779 |
| C16 | 1.0 | 0.559806 | 0.779557 | 0.434629 |
| C17 | 1.0 | 0.782025 | 0.898462 | 0.562441 |
| C18 | 1.0 | 0.888361 | 0.779968 | 0.434886 |
| C19 | 1.0 | 0.618910 | 0.547831 | 0.721988 |
| O1  | 1.0 | 0.111261 | 0.228600 | 0.686923 |
| O2  | 1.0 | 0.226663 | 0.114644 | 0.310925 |
| O3  | 1.0 | 0.442500 | 0.222258 | 0.686164 |
| O4  | 1.0 | 0.559735 | 0.114634 | 0.310818 |
| O5  | 1.0 | 0.779605 | 0.228313 | 0.686839 |
| O6  | 1.0 | 0.893255 | 0.114752 | 0.310792 |
| O7  | 1.0 | 0.108024 | 0.551944 | 0.685912 |
| O8  | 1.0 | 0.226776 | 0.449158 | 0.311172 |
| O9  | 1.0 | 0.559673 | 0.449870 | 0.312006 |
| O10 | 1.0 | 0.892192 | 0.450133 | 0.311311 |
| O11 | 1.0 | 0.110292 | 0.894044 | 0.687166 |
| O12 | 1.0 | 0.226259 | 0.781456 | 0.311319 |
| O13 | 1.0 | 0.447162 | 0.893973 | 0.687482 |
| O14 | 1.0 | 0.559996 | 0.781613 | 0.311553 |
| O15 | 1.0 | 0.780409 | 0.898736 | 0.686404 |
| O16 | 1.0 | 0.892657 | 0.782103 | 0.311838 |
| O17 | 1.0 | 0.644760 | 0.583381 | 0.778194 |

|                         | a       | b       |
|-------------------------|---------|---------|
| $2^*CO/Mo_3C_2O_2-2O_V$ | 9.13230 | 9.13230 |

|      |     |          |          |          |
|------|-----|----------|----------|----------|
| Mo1  | 1.0 | 0.112879 | 0.228844 | 0.348323 |
| Mo2  | 1.0 | 0.224079 | 0.115837 | 0.589721 |
| Mo3  | 1.0 | 0.999460 | 0.999917 | 0.468091 |
| Mo4  | 1.0 | 0.446912 | 0.228697 | 0.348568 |
| Mo5  | 1.0 | 0.557419 | 0.116738 | 0.590678 |
| Mo6  | 1.0 | 0.334055 | 0.002518 | 0.467598 |
| Mo7  | 1.0 | 0.779314 | 0.228259 | 0.347930 |
| Mo8  | 1.0 | 0.890520 | 0.118733 | 0.590365 |
| Mo9  | 1.0 | 0.665343 | 0.002126 | 0.468738 |
| Mo10 | 1.0 | 0.111273 | 0.559783 | 0.348250 |
| Mo11 | 1.0 | 0.210363 | 0.441585 | 0.586231 |
| Mo12 | 1.0 | 0.001385 | 0.341645 | 0.471634 |
| Mo13 | 1.0 | 0.445909 | 0.561416 | 0.348925 |
| Mo14 | 1.0 | 0.548375 | 0.447411 | 0.591338 |
| Mo15 | 1.0 | 0.334421 | 0.338191 | 0.471684 |
| Mo16 | 1.0 | 0.778100 | 0.560618 | 0.348970 |
| Mo17 | 1.0 | 0.894476 | 0.451283 | 0.595589 |
| Mo18 | 1.0 | 0.670629 | 0.343495 | 0.473162 |

|      |     |          |          |          |
|------|-----|----------|----------|----------|
| Mo19 | 1.0 | 0.112555 | 0.894846 | 0.348866 |
| Mo20 | 1.0 | 0.228599 | 0.786172 | 0.590612 |
| Mo21 | 1.0 | 0.997348 | 0.667811 | 0.471086 |
| Mo22 | 1.0 | 0.446099 | 0.894554 | 0.348555 |
| Mo23 | 1.0 | 0.565228 | 0.799825 | 0.586953 |
| Mo24 | 1.0 | 0.333852 | 0.670872 | 0.470132 |
| Mo25 | 1.0 | 0.778257 | 0.894648 | 0.348592 |
| Mo26 | 1.0 | 0.898288 | 0.799685 | 0.587350 |
| Mo27 | 1.0 | 0.664234 | 0.667988 | 0.473606 |
| C1   | 1.0 | 0.108580 | 0.221736 | 0.529402 |
| C2   | 1.0 | 0.223493 | 0.119486 | 0.408307 |
| C3   | 1.0 | 0.441171 | 0.218747 | 0.529064 |
| C4   | 1.0 | 0.560258 | 0.120493 | 0.408329 |
| C5   | 1.0 | 0.776115 | 0.225852 | 0.530951 |
| C6   | 1.0 | 0.890685 | 0.118322 | 0.408541 |
| C7   | 1.0 | 0.112613 | 0.567708 | 0.530770 |
| C8   | 1.0 | 0.223577 | 0.449499 | 0.408901 |
| C9   | 1.0 | 0.443241 | 0.565250 | 0.535573 |
| C10  | 1.0 | 0.556832 | 0.449695 | 0.409690 |
| C11  | 1.0 | 0.780164 | 0.563574 | 0.538220 |
| C12  | 1.0 | 0.889339 | 0.448300 | 0.408754 |
| C13  | 1.0 | 0.117651 | 0.895836 | 0.529811 |
| C14  | 1.0 | 0.219571 | 0.779183 | 0.407952 |
| C15  | 1.0 | 0.443633 | 0.897892 | 0.529969 |
| C16  | 1.0 | 0.557060 | 0.781882 | 0.408338 |
| C17  | 1.0 | 0.781147 | 0.899959 | 0.529389 |
| C18  | 1.0 | 0.885519 | 0.779754 | 0.408681 |
| C19  | 1.0 | 0.542329 | 0.549250 | 0.675976 |
| C20  | 1.0 | 0.851143 | 0.540015 | 0.679022 |
| O1   | 1.0 | 0.113424 | 0.228263 | 0.645764 |
| O2   | 1.0 | 0.224442 | 0.117097 | 0.292584 |
| O3   | 1.0 | 0.440942 | 0.221784 | 0.645912 |
| O4   | 1.0 | 0.557217 | 0.117128 | 0.292420 |
| O5   | 1.0 | 0.779235 | 0.222168 | 0.647760 |
| O6   | 1.0 | 0.891004 | 0.117150 | 0.292417 |
| O7   | 1.0 | 0.127963 | 0.561071 | 0.647182 |
| O8   | 1.0 | 0.224335 | 0.450849 | 0.292539 |
| O9   | 1.0 | 0.557067 | 0.450980 | 0.292990 |
| O10  | 1.0 | 0.889543 | 0.450714 | 0.292423 |
| O11  | 1.0 | 0.114983 | 0.897919 | 0.646139 |
| O12  | 1.0 | 0.223549 | 0.783581 | 0.292629 |
| O13  | 1.0 | 0.449447 | 0.896080 | 0.646967 |
| O14  | 1.0 | 0.557736 | 0.783744 | 0.292525 |
| O15  | 1.0 | 0.783001 | 0.902293 | 0.646185 |

|     |     |          |          |          |
|-----|-----|----------|----------|----------|
| O16 | 1.0 | 0.890661 | 0.784062 | 0.292974 |
| O17 | 1.0 | 0.532926 | 0.588697 | 0.727399 |
| O18 | 1.0 | 0.852906 | 0.576541 | 0.731474 |

|                                                                      | a       | b       |
|----------------------------------------------------------------------|---------|---------|
| 2*COH/Mo <sub>3</sub> C <sub>2</sub> O <sub>2</sub> -2O <sub>V</sub> | 9.13230 | 9.13230 |

|      |     |          |          |          |
|------|-----|----------|----------|----------|
| Mo1  | 1.0 | 0.116536 | 0.231882 | 0.350313 |
| Mo2  | 1.0 | 0.226752 | 0.111457 | 0.592984 |
| Mo3  | 1.0 | 0.005077 | 0.005012 | 0.471170 |
| Mo4  | 1.0 | 0.450023 | 0.231835 | 0.350337 |
| Mo5  | 1.0 | 0.559729 | 0.111328 | 0.592847 |
| Mo6  | 1.0 | 0.337875 | 0.004686 | 0.471017 |
| Mo7  | 1.0 | 0.783424 | 0.231880 | 0.350327 |
| Mo8  | 1.0 | 0.892903 | 0.110935 | 0.591905 |
| Mo9  | 1.0 | 0.671175 | 0.005330 | 0.470856 |
| Mo10 | 1.0 | 0.116758 | 0.565053 | 0.350332 |
| Mo11 | 1.0 | 0.221915 | 0.442835 | 0.591418 |
| Mo12 | 1.0 | 0.005282 | 0.340124 | 0.472725 |
| Mo13 | 1.0 | 0.449843 | 0.564519 | 0.350966 |
| Mo14 | 1.0 | 0.559302 | 0.442776 | 0.594773 |
| Mo15 | 1.0 | 0.338559 | 0.338980 | 0.472908 |
| Mo16 | 1.0 | 0.783171 | 0.564757 | 0.350955 |
| Mo17 | 1.0 | 0.896916 | 0.442832 | 0.591064 |
| Mo18 | 1.0 | 0.671651 | 0.338940 | 0.472981 |
| Mo19 | 1.0 | 0.116751 | 0.898376 | 0.350459 |
| Mo20 | 1.0 | 0.228825 | 0.781996 | 0.593371 |
| Mo21 | 1.0 | 0.004124 | 0.672840 | 0.472670 |
| Mo22 | 1.0 | 0.449801 | 0.898349 | 0.350509 |
| Mo23 | 1.0 | 0.560224 | 0.782760 | 0.592514 |
| Mo24 | 1.0 | 0.339812 | 0.671993 | 0.472818 |
| Mo25 | 1.0 | 0.783397 | 0.898239 | 0.350284 |
| Mo26 | 1.0 | 0.897784 | 0.782829 | 0.592432 |
| Mo27 | 1.0 | 0.671189 | 0.670229 | 0.473806 |
| C1   | 1.0 | 0.114839 | 0.221202 | 0.532599 |
| C2   | 1.0 | 0.227471 | 0.119541 | 0.409952 |
| C3   | 1.0 | 0.445561 | 0.218300 | 0.532149 |
| C4   | 1.0 | 0.561798 | 0.119755 | 0.409848 |
| C5   | 1.0 | 0.779629 | 0.220873 | 0.532542 |
| C6   | 1.0 | 0.894852 | 0.119941 | 0.410312 |
| C7   | 1.0 | 0.119398 | 0.564647 | 0.532871 |
| C8   | 1.0 | 0.226736 | 0.451585 | 0.410722 |
| C9   | 1.0 | 0.448438 | 0.559658 | 0.535468 |
| C10  | 1.0 | 0.560553 | 0.451006 | 0.411022 |



|     |     |          |          |          |
|-----|-----|----------|----------|----------|
| C11 | 1.0 | 0.785708 | 0.559952 | 0.535424 |
| C12 | 1.0 | 0.894645 | 0.451596 | 0.410772 |
| C13 | 1.0 | 0.121005 | 0.894430 | 0.533406 |
| C14 | 1.0 | 0.226548 | 0.782601 | 0.409930 |
| C15 | 1.0 | 0.446962 | 0.894365 | 0.533101 |
| C16 | 1.0 | 0.561800 | 0.784045 | 0.410519 |
| C17 | 1.0 | 0.783427 | 0.894469 | 0.531801 |
| C18 | 1.0 | 0.892671 | 0.784201 | 0.410441 |
| C19 | 1.0 | 0.465739 | 0.565988 | 0.653977 |
| C20 | 1.0 | 0.775227 | 0.565447 | 0.653841 |
| O1  | 1.0 | 0.114305 | 0.221813 | 0.648714 |
| O2  | 1.0 | 0.228278 | 0.122593 | 0.294258 |
| O3  | 1.0 | 0.446521 | 0.217486 | 0.649907 |
| O4  | 1.0 | 0.561315 | 0.122399 | 0.294222 |
| O5  | 1.0 | 0.784000 | 0.222927 | 0.648724 |
| O6  | 1.0 | 0.894683 | 0.122280 | 0.294201 |
| O7  | 1.0 | 0.115596 | 0.555710 | 0.649198 |
| O8  | 1.0 | 0.228483 | 0.456009 | 0.294465 |
| O9  | 1.0 | 0.561901 | 0.456343 | 0.294655 |
| O10 | 1.0 | 0.894920 | 0.456037 | 0.294503 |
| O11 | 1.0 | 0.117130 | 0.889320 | 0.650679 |
| O12 | 1.0 | 0.228024 | 0.788993 | 0.294245 |
| O13 | 1.0 | 0.449708 | 0.889920 | 0.650589 |
| O14 | 1.0 | 0.561191 | 0.788413 | 0.294616 |
| O15 | 1.0 | 0.784987 | 0.893520 | 0.649037 |
| O16 | 1.0 | 0.894425 | 0.788645 | 0.294535 |
| O17 | 1.0 | 0.453422 | 0.563788 | 0.716615 |
| O18 | 1.0 | 0.790550 | 0.561408 | 0.716073 |
| H1  | 1.0 | 0.903559 | 0.649466 | 0.729894 |
| H2  | 1.0 | 0.437559 | 0.656966 | 0.731482 |

|                                                                          | a       | b       |
|--------------------------------------------------------------------------|---------|---------|
| *COH-*COH/Mo <sub>3</sub> C <sub>2</sub> O <sub>2</sub> -2O <sub>v</sub> | 9.13230 | 9.13230 |

|      |     |          |          |          |
|------|-----|----------|----------|----------|
| Mo1  | 1.0 | 0.119703 | 0.232664 | 0.349894 |
| Mo2  | 1.0 | 0.230449 | 0.113772 | 0.593865 |
| Mo3  | 1.0 | 0.012899 | 0.008632 | 0.471171 |
| Mo4  | 1.0 | 0.453037 | 0.232516 | 0.350340 |
| Mo5  | 1.0 | 0.565748 | 0.114771 | 0.594171 |
| Mo6  | 1.0 | 0.343118 | 0.007393 | 0.471112 |
| Mo7  | 1.0 | 0.786710 | 0.232812 | 0.349805 |
| Mo8  | 1.0 | 0.900721 | 0.119025 | 0.593126 |
| Mo9  | 1.0 | 0.674948 | 0.009717 | 0.471198 |
| Mo10 | 1.0 | 0.119230 | 0.565051 | 0.351062 |

|      |     |          |          |          |
|------|-----|----------|----------|----------|
| Mo11 | 1.0 | 0.219218 | 0.440857 | 0.586947 |
| Mo12 | 1.0 | 0.011054 | 0.343753 | 0.473566 |
| Mo13 | 1.0 | 0.452657 | 0.564666 | 0.351244 |
| Mo14 | 1.0 | 0.563043 | 0.446497 | 0.587874 |
| Mo15 | 1.0 | 0.345130 | 0.339420 | 0.474092 |
| Mo16 | 1.0 | 0.785685 | 0.564725 | 0.351257 |
| Mo17 | 1.0 | 0.904109 | 0.440623 | 0.588514 |
| Mo18 | 1.0 | 0.674680 | 0.339930 | 0.474428 |
| Mo19 | 1.0 | 0.119572 | 0.899207 | 0.350860 |
| Mo20 | 1.0 | 0.234428 | 0.787301 | 0.593605 |
| Mo21 | 1.0 | 0.005999 | 0.673834 | 0.474184 |
| Mo22 | 1.0 | 0.453329 | 0.899418 | 0.350881 |
| Mo23 | 1.0 | 0.576490 | 0.791067 | 0.595830 |
| Mo24 | 1.0 | 0.345828 | 0.674777 | 0.473705 |
| Mo25 | 1.0 | 0.786046 | 0.898235 | 0.350702 |
| Mo26 | 1.0 | 0.892560 | 0.789033 | 0.596673 |
| Mo27 | 1.0 | 0.676928 | 0.674987 | 0.474623 |
| C1   | 1.0 | 0.119326 | 0.221052 | 0.532333 |
| C2   | 1.0 | 0.231120 | 0.122949 | 0.410099 |
| C3   | 1.0 | 0.449929 | 0.218872 | 0.532772 |
| C4   | 1.0 | 0.567501 | 0.122505 | 0.410062 |
| C5   | 1.0 | 0.782922 | 0.222129 | 0.532916 |
| C6   | 1.0 | 0.898737 | 0.122304 | 0.410712 |
| C7   | 1.0 | 0.124693 | 0.571024 | 0.531450 |
| C8   | 1.0 | 0.230796 | 0.451949 | 0.411256 |
| C9   | 1.0 | 0.452990 | 0.564725 | 0.537423 |
| C10  | 1.0 | 0.564841 | 0.453384 | 0.411691 |
| C11  | 1.0 | 0.791933 | 0.563731 | 0.538501 |
| C12  | 1.0 | 0.897168 | 0.451816 | 0.411223 |
| C13  | 1.0 | 0.123342 | 0.896518 | 0.533740 |
| C14  | 1.0 | 0.230157 | 0.784591 | 0.411063 |
| C15  | 1.0 | 0.453124 | 0.897239 | 0.533699 |
| C16  | 1.0 | 0.565809 | 0.785432 | 0.411194 |
| C17  | 1.0 | 0.789645 | 0.896913 | 0.534656 |
| C18  | 1.0 | 0.895675 | 0.785259 | 0.411021 |
| C19  | 1.0 | 0.564305 | 0.620946 | 0.672431 |
| C20  | 1.0 | 0.713355 | 0.609753 | 0.671898 |
| O1   | 1.0 | 0.125021 | 0.232546 | 0.648962 |
| O2   | 1.0 | 0.230622 | 0.121868 | 0.294270 |
| O3   | 1.0 | 0.455304 | 0.228755 | 0.648763 |
| O4   | 1.0 | 0.563282 | 0.122335 | 0.294306 |
| O5   | 1.0 | 0.791207 | 0.231874 | 0.649315 |
| O6   | 1.0 | 0.897031 | 0.121469 | 0.294327 |
| O7   | 1.0 | 0.123155 | 0.555434 | 0.647479 |

|     |     |          |          |          |
|-----|-----|----------|----------|----------|
| O8  | 1.0 | 0.230513 | 0.456509 | 0.294768 |
| O9  | 1.0 | 0.563661 | 0.456060 | 0.294905 |
| O10 | 1.0 | 0.897375 | 0.456455 | 0.294728 |
| O11 | 1.0 | 0.121665 | 0.895507 | 0.651037 |
| O12 | 1.0 | 0.229951 | 0.788103 | 0.295103 |
| O13 | 1.0 | 0.456933 | 0.895518 | 0.651293 |
| O14 | 1.0 | 0.562914 | 0.787993 | 0.295123 |
| O15 | 1.0 | 0.799734 | 0.919235 | 0.651476 |
| O16 | 1.0 | 0.897029 | 0.787888 | 0.295016 |
| O17 | 1.0 | 0.471743 | 0.576543 | 0.726267 |
| O18 | 1.0 | 0.767534 | 0.556344 | 0.721530 |
| H1  | 1.0 | 0.696950 | 0.540537 | 0.758807 |
| H2  | 1.0 | 0.369037 | 0.584080 | 0.721616 |

|                                                                        | a       | b       |
|------------------------------------------------------------------------|---------|---------|
| Slab /Mo <sub>2</sub> TiC <sub>2</sub> O <sub>2</sub> -2O <sub>V</sub> | 9.08280 | 9.08280 |

|      |     |          |          |          |
|------|-----|----------|----------|----------|
| Mo1  | 1.0 | 0.112299 | 0.223749 | 0.371585 |
| Mo2  | 1.0 | 0.225063 | 0.113550 | 0.628489 |
| Mo3  | 1.0 | 0.445329 | 0.223549 | 0.371215 |
| Mo4  | 1.0 | 0.556920 | 0.112769 | 0.628633 |
| Mo5  | 1.0 | 0.778974 | 0.223468 | 0.371216 |
| Mo6  | 1.0 | 0.889599 | 0.113422 | 0.628460 |
| Mo7  | 1.0 | 0.112468 | 0.556955 | 0.371775 |
| Mo8  | 1.0 | 0.218719 | 0.436349 | 0.627212 |
| Mo9  | 1.0 | 0.445470 | 0.556994 | 0.371763 |
| Mo10 | 1.0 | 0.558727 | 0.441225 | 0.628208 |
| Mo11 | 1.0 | 0.778983 | 0.557060 | 0.371421 |
| Mo12 | 1.0 | 0.883736 | 0.441348 | 0.628243 |
| Mo13 | 1.0 | 0.111987 | 0.889722 | 0.371428 |
| Mo14 | 1.0 | 0.226627 | 0.784041 | 0.627876 |
| Mo15 | 1.0 | 0.445158 | 0.889471 | 0.371482 |
| Mo16 | 1.0 | 0.558202 | 0.783931 | 0.627815 |
| Mo17 | 1.0 | 0.778749 | 0.889838 | 0.371407 |
| Mo18 | 1.0 | 0.888540 | 0.776113 | 0.628195 |
| Ti1  | 1.0 | 0.002254 | 0.001785 | 0.498936 |
| Ti2  | 1.0 | 0.335158 | 0.002138 | 0.498902 |
| Ti3  | 1.0 | 0.669196 | 0.001934 | 0.498806 |
| Ti4  | 1.0 | 0.003145 | 0.337389 | 0.501268 |
| Ti5  | 1.0 | 0.336311 | 0.337455 | 0.501280 |
| Ti6  | 1.0 | 0.668854 | 0.334906 | 0.498706 |
| Ti7  | 1.0 | 0.003120 | 0.667003 | 0.500778 |
| Ti8  | 1.0 | 0.334443 | 0.666439 | 0.502970 |
| Ti9  | 1.0 | 0.666279 | 0.667305 | 0.500397 |

|     |     |          |          |          |
|-----|-----|----------|----------|----------|
| C1  | 1.0 | 0.111768 | 0.221922 | 0.563503 |
| C2  | 1.0 | 0.224072 | 0.113483 | 0.435821 |
| C3  | 1.0 | 0.446764 | 0.223177 | 0.563681 |
| C4  | 1.0 | 0.556800 | 0.112464 | 0.435456 |
| C5  | 1.0 | 0.777942 | 0.223113 | 0.563767 |
| C6  | 1.0 | 0.890864 | 0.113486 | 0.435841 |
| C7  | 1.0 | 0.111269 | 0.556161 | 0.569219 |
| C8  | 1.0 | 0.224021 | 0.446598 | 0.436556 |
| C9  | 1.0 | 0.446258 | 0.556006 | 0.569234 |
| C10 | 1.0 | 0.556607 | 0.446167 | 0.435966 |
| C11 | 1.0 | 0.777915 | 0.554344 | 0.563320 |
| C12 | 1.0 | 0.891021 | 0.446197 | 0.435957 |
| C13 | 1.0 | 0.112999 | 0.891100 | 0.563812 |
| C14 | 1.0 | 0.223783 | 0.778167 | 0.436309 |
| C15 | 1.0 | 0.446893 | 0.892190 | 0.563378 |
| C16 | 1.0 | 0.555845 | 0.778293 | 0.436229 |
| C17 | 1.0 | 0.779597 | 0.891034 | 0.563726 |
| C18 | 1.0 | 0.890068 | 0.778440 | 0.436026 |
| O1  | 1.0 | 0.115656 | 0.229302 | 0.688051 |
| O2  | 1.0 | 0.222753 | 0.112036 | 0.311824 |
| O3  | 1.0 | 0.445814 | 0.226369 | 0.688245 |
| O4  | 1.0 | 0.556155 | 0.111875 | 0.311731 |
| O5  | 1.0 | 0.781724 | 0.226374 | 0.688201 |
| O6  | 1.0 | 0.889998 | 0.112300 | 0.311841 |
| O7  | 1.0 | 0.223680 | 0.446418 | 0.312209 |
| O8  | 1.0 | 0.556702 | 0.446003 | 0.311886 |
| O9  | 1.0 | 0.777415 | 0.553415 | 0.687889 |
| O10 | 1.0 | 0.890099 | 0.445873 | 0.311892 |
| O11 | 1.0 | 0.111592 | 0.885113 | 0.687728 |
| O12 | 1.0 | 0.222920 | 0.778544 | 0.311900 |
| O13 | 1.0 | 0.442128 | 0.883336 | 0.687855 |
| O14 | 1.0 | 0.556397 | 0.778761 | 0.311928 |
| O15 | 1.0 | 0.773833 | 0.884628 | 0.687589 |
| O16 | 1.0 | 0.889838 | 0.778963 | 0.311847 |

|                                                                      | a       | b       |
|----------------------------------------------------------------------|---------|---------|
| *CO/Mo <sub>2</sub> TiC <sub>2</sub> O <sub>2</sub> -2O <sub>V</sub> | 9.08280 | 9.08280 |

|     |     |          |          |          |
|-----|-----|----------|----------|----------|
| Mo1 | 1.0 | 0.113859 | 0.226089 | 0.371439 |
| Mo2 | 1.0 | 0.222921 | 0.112394 | 0.627928 |
| Mo3 | 1.0 | 0.446777 | 0.225932 | 0.371121 |
| Mo4 | 1.0 | 0.558238 | 0.116029 | 0.627958 |
| Mo5 | 1.0 | 0.780602 | 0.225808 | 0.371148 |
| Mo6 | 1.0 | 0.889792 | 0.112294 | 0.627913 |

|      |     |          |          |          |
|------|-----|----------|----------|----------|
| Mo7  | 1.0 | 0.114196 | 0.559001 | 0.371803 |
| Mo8  | 1.0 | 0.221424 | 0.442554 | 0.629117 |
| Mo9  | 1.0 | 0.446655 | 0.559016 | 0.371752 |
| Mo10 | 1.0 | 0.560004 | 0.443586 | 0.628229 |
| Mo11 | 1.0 | 0.780425 | 0.559113 | 0.371124 |
| Mo12 | 1.0 | 0.884114 | 0.443821 | 0.628211 |
| Mo13 | 1.0 | 0.113461 | 0.891928 | 0.371217 |
| Mo14 | 1.0 | 0.228035 | 0.787413 | 0.627228 |
| Mo15 | 1.0 | 0.446786 | 0.891868 | 0.371426 |
| Mo16 | 1.0 | 0.559396 | 0.787327 | 0.627234 |
| Mo17 | 1.0 | 0.780162 | 0.891874 | 0.371211 |
| Mo18 | 1.0 | 0.888614 | 0.776995 | 0.627752 |
| Ti1  | 1.0 | 0.002095 | 0.002389 | 0.498241 |
| Ti2  | 1.0 | 0.335954 | 0.003080 | 0.498658 |
| Ti3  | 1.0 | 0.668969 | 0.002783 | 0.498579 |
| Ti4  | 1.0 | 0.002955 | 0.336945 | 0.501340 |
| Ti5  | 1.0 | 0.335147 | 0.336928 | 0.501426 |
| Ti6  | 1.0 | 0.669201 | 0.336554 | 0.498825 |
| Ti7  | 1.0 | 0.003139 | 0.668500 | 0.500016 |
| Ti8  | 1.0 | 0.334054 | 0.666737 | 0.503323 |
| Ti9  | 1.0 | 0.666853 | 0.667861 | 0.500025 |
| C1   | 1.0 | 0.109937 | 0.219017 | 0.562662 |
| C2   | 1.0 | 0.224907 | 0.115279 | 0.435586 |
| C3   | 1.0 | 0.446714 | 0.224432 | 0.563380 |
| C4   | 1.0 | 0.557844 | 0.114682 | 0.435307 |
| C5   | 1.0 | 0.778781 | 0.224336 | 0.563376 |
| C6   | 1.0 | 0.891534 | 0.115182 | 0.435579 |
| C7   | 1.0 | 0.112126 | 0.559146 | 0.569238 |
| C8   | 1.0 | 0.224974 | 0.448176 | 0.436492 |
| C9   | 1.0 | 0.447516 | 0.559023 | 0.569272 |
| C10  | 1.0 | 0.557124 | 0.447565 | 0.435864 |
| C11  | 1.0 | 0.778487 | 0.555959 | 0.563128 |
| C12  | 1.0 | 0.891949 | 0.447582 | 0.435910 |
| C13  | 1.0 | 0.112868 | 0.891616 | 0.563127 |
| C14  | 1.0 | 0.224832 | 0.779885 | 0.436179 |
| C15  | 1.0 | 0.447801 | 0.894615 | 0.562830 |
| C16  | 1.0 | 0.556620 | 0.779693 | 0.436158 |
| C17  | 1.0 | 0.779656 | 0.891398 | 0.563128 |
| C18  | 1.0 | 0.890181 | 0.778809 | 0.435645 |
| C19  | 1.0 | 0.268277 | 0.541979 | 0.724515 |
| O1   | 1.0 | 0.107433 | 0.214672 | 0.687068 |
| O2   | 1.0 | 0.225024 | 0.115050 | 0.311707 |
| O3   | 1.0 | 0.445849 | 0.227698 | 0.687603 |
| O4   | 1.0 | 0.558495 | 0.114998 | 0.311650 |

|     |     |          |          |          |
|-----|-----|----------|----------|----------|
| O5  | 1.0 | 0.782040 | 0.227730 | 0.687587 |
| O6  | 1.0 | 0.892031 | 0.114850 | 0.311720 |
| O7  | 1.0 | 0.225542 | 0.448879 | 0.312128 |
| O8  | 1.0 | 0.558199 | 0.448837 | 0.311813 |
| O9  | 1.0 | 0.777507 | 0.554923 | 0.688117 |
| O10 | 1.0 | 0.892685 | 0.448665 | 0.311936 |
| O11 | 1.0 | 0.111832 | 0.886214 | 0.687301 |
| O12 | 1.0 | 0.225348 | 0.781698 | 0.311967 |
| O13 | 1.0 | 0.446690 | 0.893552 | 0.687023 |
| O14 | 1.0 | 0.558589 | 0.781730 | 0.311930 |
| O15 | 1.0 | 0.774347 | 0.886202 | 0.687290 |
| O16 | 1.0 | 0.891982 | 0.781674 | 0.311546 |
| O17 | 1.0 | 0.283315 | 0.576867 | 0.781473 |

|                                                                       | a       | b       |
|-----------------------------------------------------------------------|---------|---------|
| 2*CO/Mo <sub>2</sub> TiC <sub>2</sub> O <sub>2</sub> -2O <sub>v</sub> | 9.08280 | 9.08280 |

|      |     |           |          |          |
|------|-----|-----------|----------|----------|
| Mo1  | 1.0 | 0.111511  | 0.229672 | 0.372152 |
| Mo2  | 1.0 | 0.218817  | 0.117819 | 0.628373 |
| Mo3  | 1.0 | 0.444572  | 0.229388 | 0.371859 |
| Mo4  | 1.0 | 0.555117  | 0.119972 | 0.628522 |
| Mo5  | 1.0 | 0.778335  | 0.229553 | 0.371952 |
| Mo6  | 1.0 | 0.886298  | 0.115882 | 0.628887 |
| Mo7  | 1.0 | 0.111457  | 0.562443 | 0.372474 |
| Mo8  | 1.0 | 0.223866  | 0.447785 | 0.630966 |
| Mo9  | 1.0 | 0.444191  | 0.562367 | 0.372206 |
| Mo10 | 1.0 | 0.556782  | 0.447999 | 0.628160 |
| Mo11 | 1.0 | 0.778044  | 0.562530 | 0.371921 |
| Mo12 | 1.0 | 0.882000  | 0.449284 | 0.629667 |
| Mo13 | 1.0 | 0.111286  | 0.895613 | 0.371988 |
| Mo14 | 1.0 | 0.229727  | 0.793300 | 0.627211 |
| Mo15 | 1.0 | 0.444321  | 0.895548 | 0.372044 |
| Mo16 | 1.0 | 0.556191  | 0.794736 | 0.626271 |
| Mo17 | 1.0 | 0.777877  | 0.895763 | 0.371924 |
| Mo18 | 1.0 | 0.884195  | 0.783697 | 0.628540 |
| Ti1  | 1.0 | 0.000110  | 0.006633 | 0.499117 |
| Ti2  | 1.0 | 0.332525  | 0.005391 | 0.499937 |
| Ti3  | 1.0 | 0.666127  | 0.006256 | 0.499419 |
| Ti4  | 1.0 | 0.000100  | 0.339495 | 0.502464 |
| Ti5  | 1.0 | 0.333165  | 0.341453 | 0.501288 |
| Ti6  | 1.0 | 0.666485  | 0.339970 | 0.499389 |
| Ti7  | 1.0 | -0.000100 | 0.671969 | 0.500971 |
| Ti8  | 1.0 | 0.333053  | 0.671246 | 0.502366 |
| Ti9  | 1.0 | 0.665532  | 0.672692 | 0.500005 |

|     |     |          |          |          |
|-----|-----|----------|----------|----------|
| C1  | 1.0 | 0.106756 | 0.223976 | 0.563537 |
| C2  | 1.0 | 0.223094 | 0.118943 | 0.436312 |
| C3  | 1.0 | 0.443712 | 0.228785 | 0.563359 |
| C4  | 1.0 | 0.556013 | 0.118633 | 0.436124 |
| C5  | 1.0 | 0.777052 | 0.226456 | 0.564135 |
| C6  | 1.0 | 0.889676 | 0.119143 | 0.436355 |
| C7  | 1.0 | 0.112677 | 0.564584 | 0.568963 |
| C8  | 1.0 | 0.222317 | 0.451699 | 0.437018 |
| C9  | 1.0 | 0.445908 | 0.564095 | 0.567989 |
| C10 | 1.0 | 0.555228 | 0.451287 | 0.436453 |
| C11 | 1.0 | 0.776655 | 0.564700 | 0.563591 |
| C12 | 1.0 | 0.889777 | 0.451237 | 0.436801 |
| C13 | 1.0 | 0.108470 | 0.895079 | 0.563957 |
| C14 | 1.0 | 0.222508 | 0.783659 | 0.436782 |
| C15 | 1.0 | 0.445570 | 0.898860 | 0.562756 |
| C16 | 1.0 | 0.554431 | 0.783736 | 0.436495 |
| C17 | 1.0 | 0.777274 | 0.896231 | 0.563440 |
| C18 | 1.0 | 0.888770 | 0.783388 | 0.436276 |
| C19 | 1.0 | 0.349398 | 0.545612 | 0.719840 |
| C20 | 1.0 | 0.054999 | 0.538626 | 0.711322 |
| O1  | 1.0 | 0.105706 | 0.220132 | 0.688656 |
| O2  | 1.0 | 0.222234 | 0.118082 | 0.312545 |
| O3  | 1.0 | 0.443290 | 0.233134 | 0.687384 |
| O4  | 1.0 | 0.555703 | 0.118197 | 0.312500 |
| O5  | 1.0 | 0.770567 | 0.224697 | 0.688238 |
| O6  | 1.0 | 0.889101 | 0.118153 | 0.312567 |
| O7  | 1.0 | 0.222470 | 0.451622 | 0.312736 |
| O8  | 1.0 | 0.555683 | 0.451530 | 0.312531 |
| O9  | 1.0 | 0.765128 | 0.560052 | 0.688163 |
| O10 | 1.0 | 0.889777 | 0.451876 | 0.312763 |
| O11 | 1.0 | 0.111735 | 0.896285 | 0.687275 |
| O12 | 1.0 | 0.222391 | 0.784812 | 0.312672 |
| O13 | 1.0 | 0.447295 | 0.903993 | 0.688677 |
| O14 | 1.0 | 0.555739 | 0.784755 | 0.312593 |
| O15 | 1.0 | 0.773374 | 0.893856 | 0.687809 |
| O16 | 1.0 | 0.889045 | 0.784861 | 0.312518 |
| O17 | 1.0 | 0.400828 | 0.580124 | 0.774860 |
| O18 | 1.0 | 0.067857 | 0.564544 | 0.769806 |

|                                                                        | a       | b       |
|------------------------------------------------------------------------|---------|---------|
| 2*COH/Mo <sub>2</sub> TiC <sub>2</sub> O <sub>2</sub> -2O <sub>v</sub> | 9.08280 | 9.08280 |

|     |     |          |          |          |
|-----|-----|----------|----------|----------|
| Mo1 | 1.0 | 0.109920 | 0.232334 | 0.373400 |
| Mo2 | 1.0 | 0.216349 | 0.119669 | 0.630317 |

|      |     |          |          |          |
|------|-----|----------|----------|----------|
| Mo3  | 1.0 | 0.442976 | 0.232213 | 0.373397 |
| Mo4  | 1.0 | 0.551318 | 0.119448 | 0.630068 |
| Mo5  | 1.0 | 0.776634 | 0.232216 | 0.373405 |
| Mo6  | 1.0 | 0.886383 | 0.119742 | 0.630352 |
| Mo7  | 1.0 | 0.109991 | 0.565407 | 0.373644 |
| Mo8  | 1.0 | 0.215510 | 0.449197 | 0.629560 |
| Mo9  | 1.0 | 0.443037 | 0.565422 | 0.373635 |
| Mo10 | 1.0 | 0.555466 | 0.452092 | 0.629990 |
| Mo11 | 1.0 | 0.776335 | 0.565167 | 0.373438 |
| Mo12 | 1.0 | 0.880157 | 0.451803 | 0.629452 |
| Mo13 | 1.0 | 0.109828 | 0.898612 | 0.373341 |
| Mo14 | 1.0 | 0.219511 | 0.791664 | 0.629564 |
| Mo15 | 1.0 | 0.443057 | 0.898574 | 0.373541 |
| Mo16 | 1.0 | 0.555359 | 0.791280 | 0.630745 |
| Mo17 | 1.0 | 0.776298 | 0.898640 | 0.373338 |
| Mo18 | 1.0 | 0.885566 | 0.788533 | 0.629915 |
| Ti1  | 1.0 | 0.995437 | 0.007651 | 0.500686 |
| Ti2  | 1.0 | 0.329750 | 0.008598 | 0.501555 |
| Ti3  | 1.0 | 0.662656 | 0.008765 | 0.501572 |
| Ti4  | 1.0 | 0.996475 | 0.341253 | 0.502220 |
| Ti5  | 1.0 | 0.329177 | 0.341799 | 0.502298 |
| Ti6  | 1.0 | 0.663073 | 0.342395 | 0.501950 |
| Ti7  | 1.0 | 0.996535 | 0.675309 | 0.501850 |
| Ti8  | 1.0 | 0.330143 | 0.674585 | 0.503374 |
| Ti9  | 1.0 | 0.662916 | 0.675507 | 0.502054 |
| C1   | 1.0 | 0.103467 | 0.223722 | 0.564728 |
| C2   | 1.0 | 0.220487 | 0.121228 | 0.437644 |
| C3   | 1.0 | 0.438731 | 0.229418 | 0.565570 |
| C4   | 1.0 | 0.553452 | 0.120798 | 0.437786 |
| C5   | 1.0 | 0.773690 | 0.229065 | 0.565330 |
| C6   | 1.0 | 0.886837 | 0.121187 | 0.437584 |
| C7   | 1.0 | 0.106127 | 0.566460 | 0.567039 |
| C8   | 1.0 | 0.220344 | 0.454257 | 0.438240 |
| C9   | 1.0 | 0.444149 | 0.566553 | 0.567747 |
| C10  | 1.0 | 0.553159 | 0.453945 | 0.438010 |
| C11  | 1.0 | 0.774959 | 0.566706 | 0.564842 |
| C12  | 1.0 | 0.887053 | 0.453815 | 0.437982 |
| C13  | 1.0 | 0.104428 | 0.898377 | 0.565708 |
| C14  | 1.0 | 0.220410 | 0.786612 | 0.438039 |
| C15  | 1.0 | 0.441795 | 0.899064 | 0.565133 |
| C16  | 1.0 | 0.552810 | 0.786692 | 0.438020 |
| C17  | 1.0 | 0.776632 | 0.898225 | 0.565706 |
| C18  | 1.0 | 0.886345 | 0.786394 | 0.437447 |
| C19  | 1.0 | 0.425919 | 0.570458 | 0.695033 |



|     |     |          |          |          |
|-----|-----|----------|----------|----------|
| C20 | 1.0 | 0.123604 | 0.572803 | 0.693918 |
| O1  | 1.0 | 0.106515 | 0.228489 | 0.691356 |
| O2  | 1.0 | 0.221652 | 0.121225 | 0.313920 |
| O3  | 1.0 | 0.441852 | 0.233059 | 0.689425 |
| O4  | 1.0 | 0.554952 | 0.121299 | 0.314115 |
| O5  | 1.0 | 0.773690 | 0.232833 | 0.689110 |
| O6  | 1.0 | 0.888193 | 0.121279 | 0.313914 |
| O7  | 1.0 | 0.221792 | 0.454873 | 0.314212 |
| O8  | 1.0 | 0.554879 | 0.454585 | 0.314097 |
| O9  | 1.0 | 0.772956 | 0.561283 | 0.689260 |
| O10 | 1.0 | 0.888365 | 0.454417 | 0.314134 |
| O11 | 1.0 | 0.107507 | 0.899352 | 0.691079 |
| O12 | 1.0 | 0.221703 | 0.787725 | 0.314164 |
| O13 | 1.0 | 0.441706 | 0.901915 | 0.689920 |
| O14 | 1.0 | 0.554880 | 0.787836 | 0.314121 |
| O15 | 1.0 | 0.776732 | 0.901571 | 0.690648 |
| O16 | 1.0 | 0.888233 | 0.787801 | 0.313922 |
| O17 | 1.0 | 0.439042 | 0.562300 | 0.761463 |
| O18 | 1.0 | 0.105325 | 0.563818 | 0.761065 |
| H1  | 1.0 | 0.336604 | 0.463864 | 0.780221 |
| H2  | 1.0 | 0.090394 | 0.657271 | 0.778134 |

|                                                                            | a       | b       |
|----------------------------------------------------------------------------|---------|---------|
| *COH-*COH/Mo <sub>2</sub> TiC <sub>2</sub> O <sub>2</sub> -2O <sub>v</sub> | 9.08280 | 9.08280 |

|      |     |          |          |          |
|------|-----|----------|----------|----------|
| Mo1  | 1.0 | 0.122023 | 0.230796 | 0.374731 |
| Mo2  | 1.0 | 0.233362 | 0.117813 | 0.630747 |
| Mo3  | 1.0 | 0.455297 | 0.230579 | 0.374247 |
| Mo4  | 1.0 | 0.569126 | 0.118809 | 0.631056 |
| Mo5  | 1.0 | 0.789136 | 0.230789 | 0.374553 |
| Mo6  | 1.0 | 0.899726 | 0.117261 | 0.631673 |
| Mo7  | 1.0 | 0.122138 | 0.563835 | 0.375108 |
| Mo8  | 1.0 | 0.239077 | 0.446547 | 0.629781 |
| Mo9  | 1.0 | 0.455084 | 0.563939 | 0.374859 |
| Mo10 | 1.0 | 0.567441 | 0.447551 | 0.630665 |
| Mo11 | 1.0 | 0.788915 | 0.563893 | 0.374622 |
| Mo12 | 1.0 | 0.895227 | 0.451749 | 0.633018 |
| Mo13 | 1.0 | 0.121913 | 0.896684 | 0.374578 |
| Mo14 | 1.0 | 0.237165 | 0.789544 | 0.632821 |
| Mo15 | 1.0 | 0.454932 | 0.896626 | 0.374691 |
| Mo16 | 1.0 | 0.570811 | 0.792286 | 0.630981 |
| Mo17 | 1.0 | 0.788544 | 0.896777 | 0.374670 |
| Mo18 | 1.0 | 0.897266 | 0.785750 | 0.630972 |
| Ti1  | 1.0 | 0.010924 | 0.005152 | 0.501759 |

|     |     |          |          |          |
|-----|-----|----------|----------|----------|
| Ti2 | 1.0 | 0.344206 | 0.005441 | 0.502302 |
| Ti3 | 1.0 | 0.678117 | 0.006922 | 0.501768 |
| Ti4 | 1.0 | 0.011591 | 0.340011 | 0.505339 |
| Ti5 | 1.0 | 0.344870 | 0.340293 | 0.502532 |
| Ti6 | 1.0 | 0.678675 | 0.339829 | 0.501479 |
| Ti7 | 1.0 | 0.010589 | 0.671741 | 0.504295 |
| Ti8 | 1.0 | 0.343265 | 0.671070 | 0.505985 |
| Ti9 | 1.0 | 0.674189 | 0.671404 | 0.504224 |
| C1  | 1.0 | 0.118775 | 0.223068 | 0.565382 |
| C2  | 1.0 | 0.233338 | 0.118490 | 0.438785 |
| C3  | 1.0 | 0.457631 | 0.229041 | 0.565940 |
| C4  | 1.0 | 0.566275 | 0.118408 | 0.438619 |
| C5  | 1.0 | 0.789267 | 0.227377 | 0.566844 |
| C6  | 1.0 | 0.900471 | 0.119423 | 0.438979 |
| C7  | 1.0 | 0.122853 | 0.561445 | 0.572847 |
| C8  | 1.0 | 0.232938 | 0.452298 | 0.439673 |
| C9  | 1.0 | 0.459318 | 0.564336 | 0.571105 |
| C10 | 1.0 | 0.566352 | 0.451934 | 0.438920 |
| C11 | 1.0 | 0.788341 | 0.562510 | 0.566849 |
| C12 | 1.0 | 0.900893 | 0.452151 | 0.439350 |
| C13 | 1.0 | 0.121328 | 0.894839 | 0.567039 |
| C14 | 1.0 | 0.232619 | 0.783781 | 0.439672 |
| C15 | 1.0 | 0.458337 | 0.896967 | 0.566567 |
| C16 | 1.0 | 0.564647 | 0.783696 | 0.439390 |
| C17 | 1.0 | 0.788968 | 0.897025 | 0.566671 |
| C18 | 1.0 | 0.899113 | 0.783136 | 0.439132 |
| C19 | 1.0 | 0.215245 | 0.560105 | 0.719064 |
| C20 | 1.0 | 0.066277 | 0.569075 | 0.718414 |
| O1  | 1.0 | 0.125489 | 0.223897 | 0.690027 |
| O2  | 1.0 | 0.233091 | 0.120517 | 0.314988 |
| O3  | 1.0 | 0.455122 | 0.231417 | 0.690184 |
| O4  | 1.0 | 0.566801 | 0.120436 | 0.314931 |
| O5  | 1.0 | 0.786086 | 0.225563 | 0.691456 |
| O6  | 1.0 | 0.899899 | 0.120069 | 0.315162 |
| O7  | 1.0 | 0.232908 | 0.453887 | 0.315334 |
| O8  | 1.0 | 0.566439 | 0.453954 | 0.314992 |
| O9  | 1.0 | 0.775661 | 0.562022 | 0.691841 |
| O10 | 1.0 | 0.900040 | 0.453707 | 0.315137 |
| O11 | 1.0 | 0.123999 | 0.901050 | 0.690964 |
| O12 | 1.0 | 0.233205 | 0.786644 | 0.315236 |
| O13 | 1.0 | 0.460264 | 0.901446 | 0.691596 |
| O14 | 1.0 | 0.566417 | 0.786998 | 0.315222 |
| O15 | 1.0 | 0.785653 | 0.892753 | 0.691358 |
| O16 | 1.0 | 0.899922 | 0.787242 | 0.315077 |

|            |            |                  |                 |                 |
|------------|------------|------------------|-----------------|-----------------|
| <b>O17</b> | <b>1.0</b> | <b>0.309157</b>  | <b>0.587397</b> | <b>0.774911</b> |
| <b>O18</b> | <b>1.0</b> | <b>0.016570</b>  | <b>0.603804</b> | <b>0.777787</b> |
| <b>H1</b>  | <b>1.0</b> | <b>0.256988</b>  | <b>0.614495</b> | <b>0.813047</b> |
| <b>H2</b>  | <b>1.0</b> | <b>-0.092246</b> | <b>0.600879</b> | <b>0.770231</b> |
